# Supplementary material for: The rapid synthesis of photocatalytic (BiO)2CO3 single-crystal nanosheets via an eco-friendly approach
Source: Royal Society of Chemistry journal article supplement (doi:10.1039/c3ce42436g), 2014-01-01
Supplement: c3ce42436g1.pdf [file c3ce42436g1.pdf]

## Supporting Information

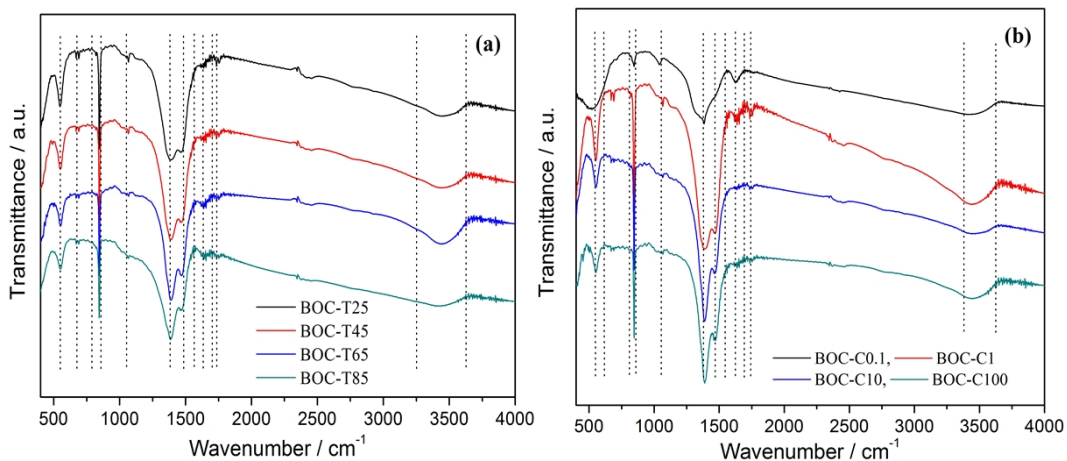

**Fig. S1** FT-IR spectra of the samples obtained at different temperature (a) and different CO<sub>2</sub> concentration (b).

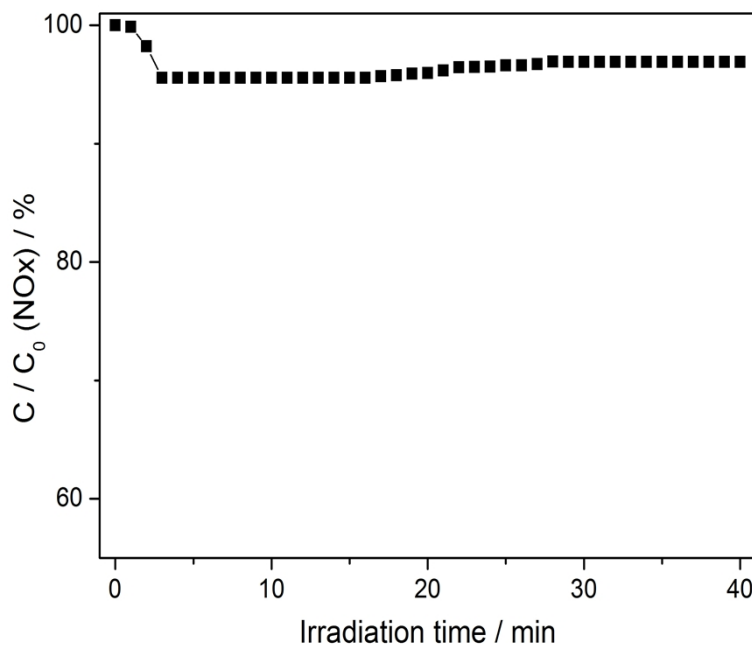

**Fig. S2** Photocatalytic removal of NO<sub>x</sub> of the (BiO)<sub>2</sub>CO<sub>3</sub> sample under visible light irradiation.
